# Supplementary material for: Ensuring Continuity of Tuberculosis Care during Social Distancing through Integrated Active Case Finding at COVID-19 Vaccination Events in Vietnam: A Cohort Study
Source: MDPI journal article supplement (doi:10.3390/tropicalmed9010026), 2024-01-22
Supplement: s1 [file s1]

# Supplementary Information

## Supplementary results

**Table S1.** Univariate logistic regression of association between baseline characteristics and TB diagnosis.

| Baseline Characteristics                | OR    | 95% CI        | P-value          |
|-----------------------------------------|-------|---------------|------------------|
| Gender                                  |       |               |                  |
| Female                                  | Ref   |               |                  |
| Male                                    | 6.58  | [4.33- 9.98]  | <b>&lt;0.001</b> |
| Age Group (N = 48,043)                  |       |               |                  |
| <15 years                               | 1     | n/a           | <b>n/a</b>       |
| 15-29 years                             | Ref   |               |                  |
| 30-44 years                             | 0.59  | [0.32- 1.10]  | 0.099            |
| 45-59 years                             | 1.77  | [1.17- 2.70]  | <b>0.007</b>     |
| ≥60 years                               | 1.99  | [1.31- 3.05]  | <b>0.001</b>     |
| Social health insurance                 |       |               |                  |
| No                                      | Ref   |               |                  |
| Yes                                     | 1.33  | [0.92- 1.91]  | 0.132            |
| Co-infection with HIV                   |       |               |                  |
| No                                      | Ref   |               |                  |
| Yes                                     | 5.33  | [1.69- 16.88] | <b>0.004</b>     |
| Diabetes mellitus                       |       |               |                  |
| No                                      | Ref   |               |                  |
| Yes                                     | 1.86  | [1.03- 3.35]  | <b>0.038</b>     |
| Altered immune system                   |       |               |                  |
| No                                      | Ref   |               |                  |
| Yes                                     | 4.36  | [1.78- 10.68] | <b>0.001</b>     |
| Congregate living or working conditions |       |               |                  |
| No                                      | Ref   |               |                  |
| Yes                                     | 2.56  | [0.94 – 6.92] | 0.065            |
| Previous TB treatment                   |       |               |                  |
| No                                      | Ref   |               |                  |
| Yes                                     | 10.87 | [7.43- 15.88] | <b>&lt;0.001</b> |
| Contact person                          |       |               |                  |
| No                                      | Ref   |               |                  |
| Yes                                     | 6.15  | [3.23- 11.72] | <b>&lt;0.001</b> |
| Any TB symptoms                         |       |               |                  |
| No                                      | Ref   |               |                  |
| Yes                                     | 3.29  | [2.33- 4.65]  | <b>&lt;0.001</b> |
| Smoking                                 |       |               |                  |
| No                                      | Ref   |               |                  |
| Yes                                     | 2.90  | [1.61-5.23]   | <b>&lt;0.001</b> |

|          |  |      |              |       |
|----------|--|------|--------------|-------|
| Covid-19 |  |      |              |       |
| No       |  | Ref  |              |       |
| Yes      |  | 0.72 | [0.39- 1.33] | 0.294 |

**Table S2.** TB case detection and treatment cascade by site.

|                                        | Total            | Hanoi           | Ho Chi Minh City | Chi Hai Phong  | Can Tho         |
|----------------------------------------|------------------|-----------------|------------------|----------------|-----------------|
| Screening locations                    | 135              | 59              | 54               | 15             | 7               |
| Days of screening                      | 115              | 51              | 43               | 14             | 7               |
| Screened by CXR                        | 48,758           | 27,793          | 13,858           | 5,230          | 1,877           |
| Abnormal CXR                           | 2,051<br>(4.2%)  | 710<br>(2.6%)   | 938<br>(6.8%)    | 291<br>(5.6%)  | 112<br>(6.0%)   |
| Sputum test after abnormal CXR         | 1,998<br>(97.4%) | 710<br>(100.0%) | 902<br>(96.2%)   | 274<br>(94.2%) | 112<br>(100.0%) |
| Bac(+) TB detected after abnormal CXR  | 130<br>(6.5%)    | 65<br>(9.2%)    | 35<br>(3.9%)     | 13<br>(4.7%)   | 17<br>(15.2%)   |
| Sputum testing outside of Double-X     | 57<br>(0.1%)     | 14              | 36               | 7              | -               |
| Bac(+) TB detected outside of Double-X | 1<br>(1.8%)      | 1<br>(7.1%)     | -                | -              | -               |
| Clinically diagnosed TB                | 43<br>(0.1%)     | 18              | 3                | 6              | 16              |
| All Forms of TB detected               | 174<br>(0.4%)    | 84              | 38               | 19             | 33              |
| All Forms of TB linked to treatment    | 156<br>(89.7%)   | 76<br>(90.5%)   | 34<br>(89.5%)    | 17<br>(89.5%)  | 29<br>(87.9%)   |
| All Forms of TB successfully treated*  | 145<br>(92.9%)   | 71<br>(93.4%)   | 29<br>(85.3%)    | 16<br>(94.1%)  | 29<br>(100.0%)  |
| TB prevalence rate (per 100,000)       | 357              | 302             | 274              | 363            | 1,758           |

HN: Ha Noi; HCM: Ho Chi Minh City; HP: Hai Phong; CT: Can Tho; CXR: Chest X Ray; Double X: Rapid screening using CXR & GeneXpert; \*cured/completed
